# Supplementary material for: Different Types of Long-Term Milk Consumption and Mortality in Adults with Cardiovascular Disease: A Population-Based Study in 7236 Australian Adults over 8.4 Years
Source: MDPI journal article supplement (doi:10.3390/nu14030704), 2022-02-08
Supplement: s1 [file s1]

**Supplementary Figure S1. Mean frequency/number of grain and fruit intake by different types of long-term milk consumption for males and females**

**a)**

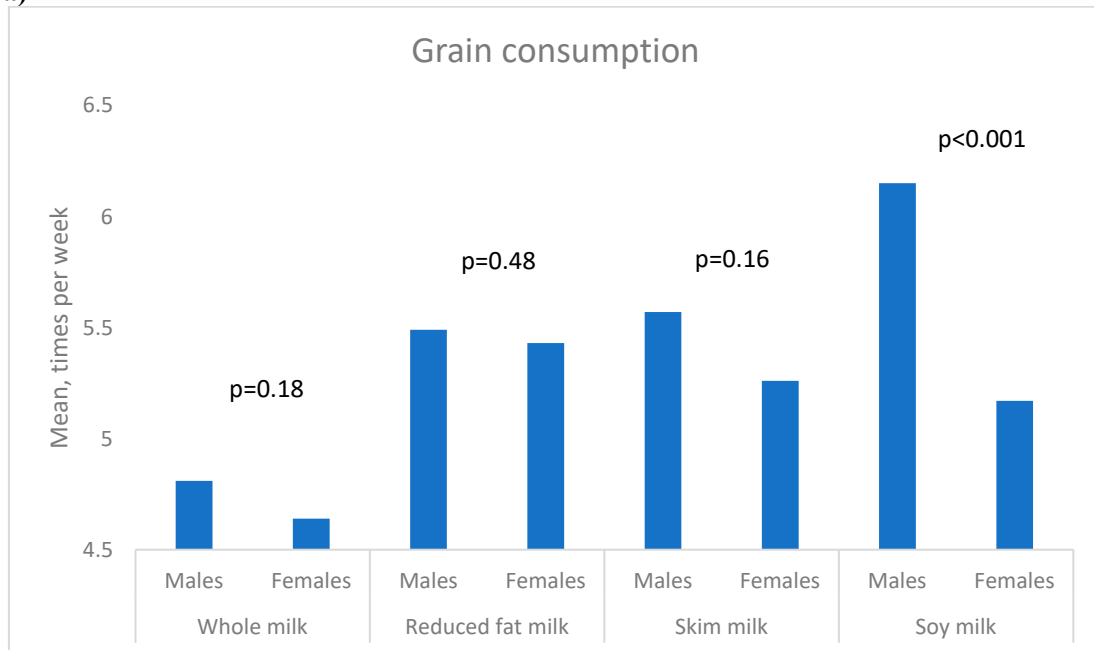

**b)**

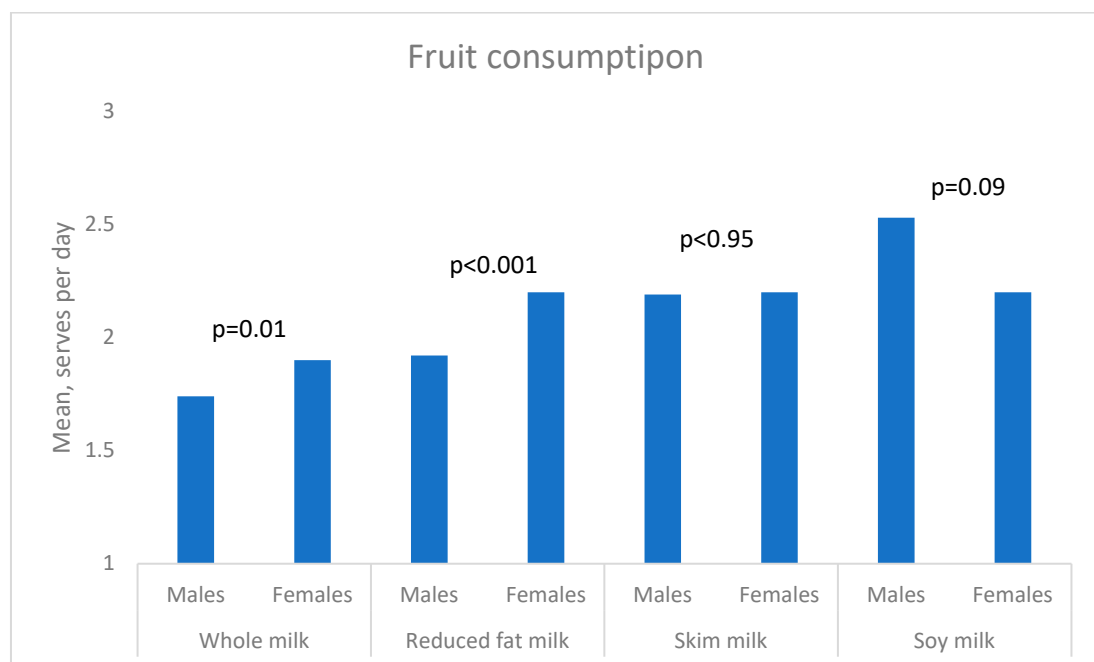

**Supplementary Figure S2. Kaplan-Meier survival estimates for different types of milk and survival by males and females**

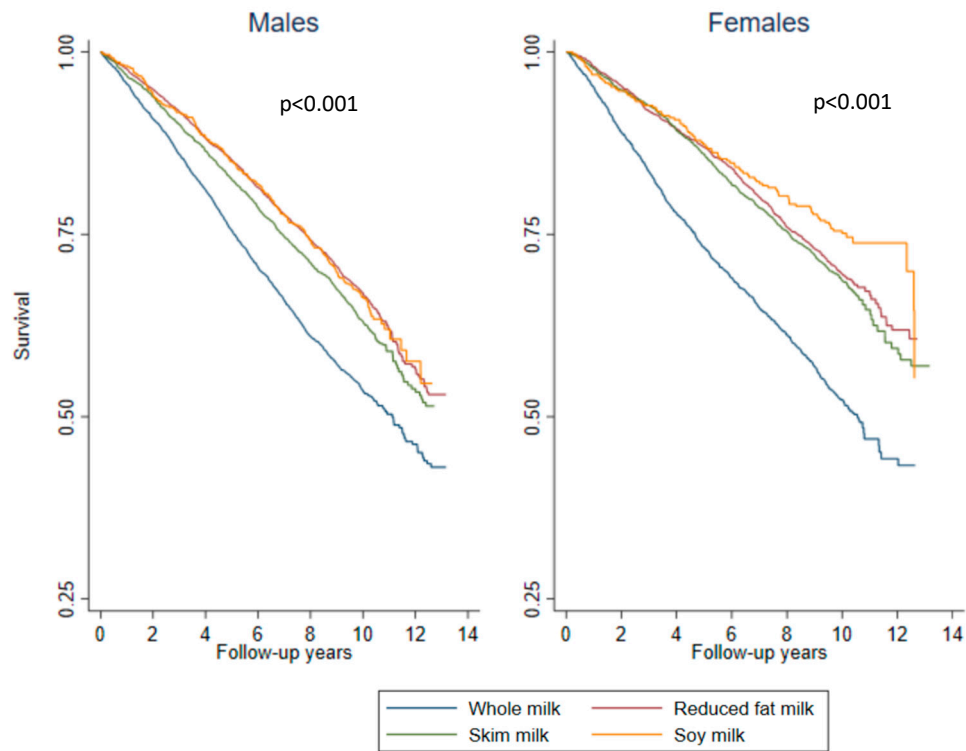

**Supplementary Table S1. Cox proportional hazard regression models of different types of milk and survival for males and females with CVD**

| Types of milk              | Crude model              |                  | Adjusted model*          |                  |
|----------------------------|--------------------------|------------------|--------------------------|------------------|
|                            | Males                    |                  |                          |                  |
|                            | Hazard Ratio             | P value          | Hazard Ratio             | P value          |
| Whole milk (N=3,612)       | 1                        |                  | 1                        |                  |
| Reduced fat milk (N=4,098) | <b>0.65 (0.61; 0.70)</b> | <b>&lt;0.001</b> | <b>0.81 (0.75; 0.88)</b> | <b>&lt;0.001</b> |
| Skim milk (N=2,402)        | <b>0.74 (0.68; 0.80)</b> | <b>&lt;0.001</b> | <b>0.82 (0.75; 0.90)</b> | <b>&lt;0.001</b> |
| Soy milk (N=581)           | <b>0.66 (0.57; 0.76)</b> | <b>&lt;0.001</b> | <b>0.76 (0.65; 0.90)</b> | <b>0.001</b>     |
| Females                    |                          |                  |                          |                  |
| Whole milk (N=1,691)       | 1                        |                  | 1                        |                  |
| Reduced fat milk (N=2,369) | <b>0.55 (0.49; 0.60)</b> | <b>&lt;0.001</b> | <b>0.75 (0.67; 0.84)</b> | <b>&lt;0.001</b> |
| Skim milk (N=1,901)        | <b>0.57 (0.52; 0.63)</b> | <b>&lt;0.001</b> | <b>0.81 (0.72; 0.92)</b> | <b>0.001</b>     |
| Soy milk (N=355)           | <b>0.44 (0.36; 0.55)</b> | <b>&lt;0.001</b> | <b>0.69 (0.54; 0.89)</b> | <b>0.004</b>     |

*\* Adjusted for socio-economic status, health behaviours, consumption of other food groups and other chronic conditions.*

**Supplementary Table S2. Cox proportional hazard regression models of different types of milk and survival for males and females with ischemic heart disease**

| Types of milk              | Crude model              |                  | Adjusted model*          |                  |
|----------------------------|--------------------------|------------------|--------------------------|------------------|
|                            | Hazard Ratio (HR)        | P value          | Hazard Ratio (HR)        | P value          |
| <b>Males</b>               |                          |                  |                          |                  |
| Whole milk (N=1,430)       | 1                        |                  | 1                        |                  |
| Reduced fat milk (N=2,069) | <b>0.67 (0.60; 0.75)</b> | <b>&lt;0.001</b> | <b>0.83 (0.72; 0.94)</b> | <b>0.003</b>     |
| Skim milk (N=1,219)        | <b>0.70 (0.61; 0.80)</b> | <b>&lt;0.001</b> | <b>0.77 (0.67; 0.90)</b> | <b>0.001</b>     |
| Soy milk (N=281)           | <b>0.71 (0.57; 0.89)</b> | <b>0.003</b>     | 0.80 (0.62; 1.04)        | 0.09             |
| <b>Females</b>             |                          |                  |                          |                  |
| Whole milk (N=516)         | 1                        |                  | 1                        |                  |
| Reduced fat milk (N=926)   | <b>0.47 (0.39; 0.56)</b> | <b>&lt;0.001</b> | <b>0.66 (0.53; 0.82)</b> | <b>&lt;0.001</b> |
| Skim milk (N=749)          | <b>0.55 (0.46; 0.66)</b> | <b>&lt;0.001</b> | 0.84 (0.68; 1.05)        | 0.13             |
| Soy milk (N=138)           | <b>0.30 (0.19; 0.45)</b> | <b>&lt;0.001</b> | <b>0.56 (0.34; 0.93)</b> | <b>0.023</b>     |

*\* Adjusted for socio-economic status, health behaviours, consumption of other food groups and other chronic conditions.*

**Supplementary Table S3. Cox proportional hazard regression models of different types of milk and survival for males and females with cerebrovascular disease**

| Types of milk            | Crude model              |                  | Adjusted model*          |              |
|--------------------------|--------------------------|------------------|--------------------------|--------------|
|                          | Hazard Ratio (HR)        | P value          | Hazard Ratio (HR)        | P value      |
| <b>Males</b>             |                          |                  |                          |              |
| Whole milk (N=284)       | 1                        |                  | 1                        |              |
| Reduced fat milk (N=245) | <b>0.61 (0.48; 0.78)</b> | <b>&lt;0.001</b> | <b>0.65 (0.48; 0.88)</b> | <b>0.005</b> |
| Skim milk (N=147)        | 0.91 (0.70; 1.18)        | 0.47             | 0.75 (0.55; 1.03)        | 0.08         |
| Soy milk (N=30)          | 0.78 (0.46; 1.32)        | 0.35             | 0.60 (0.33; 1.08)        | 0.09         |
| <b>Females</b>           |                          |                  |                          |              |
| Whole milk (N=140)       | 1                        |                  | 1                        |              |
| Reduced fat milk (N=157) | <b>0.55 (0.39; 0.77)</b> | <b>0.001</b>     | 0.82 (0.54; 1.27)        | 0.38         |
| Skim milk (N=110)        | <b>0.65 (0.45; 0.94)</b> | <b>0.022</b>     | 0.96 (0.60; 1.54)        | 0.86         |
| Soy milk (N=21)          | 0.71 (0.36; 1.42)        | 0.33             | 0.90 (0.37; 2.16)        | 0.81         |

*\* Adjusted for socio-economic status, health behaviours, consumption of other food groups and other chronic conditions.*
